# Supplementary material for: Why do dogs look back at the human in an impossible task? Looking back behaviour may be over-interpreted
Source: PubMed Central journal article supplement (PMC7181563; doi:10.1007/s10071-020-01345-8), 2020-02-23
Supplement: 10071_2020_1345_MOESM1_ESM.pdf [file 10071_2020_1345_MOESM1_ESM.pdf]

## SUPPLEMENTARY MATERIALS

### Why do dogs look back at the human in an impossible task? Looking back behaviour may be over-interpreted.

Martina Lazzaroni<sup>1</sup>, Sarah Marshall-Pescini<sup>1</sup>, Helena Manzenreiter<sup>2</sup>, Sarah Gosch<sup>2</sup>, Lucy Přibilová<sup>2</sup>, Larissa Darc<sup>1</sup>, Jim McGetrick<sup>1</sup>, Friederike Range<sup>1</sup>

<sup>1</sup>Domestication Lab, Konrad Lorenz Institute of Ethology, University of Veterinary Medicine, Vienna, Austria

<sup>2</sup>Comparative Cognition, Messerli Research Institute, University of Veterinary Medicine, Vienna, Austria

Corresponding authors

E-mail: martina.lazzaroni@vetmeduni.at.ac

E-mail: friederike.range@vetmeduni.at.ac

**The following are reported for all models: the estimates, together with standard errors, tests, confidence limits, as well as minimum and maximum of estimates derived after excluding individuals one at a time (model stability).**

Table 1. Results of the model-P1: differences in persistence across conditions in pet dogs.

| term                              | Estimate | SE    | $\chi^2$ | p     | lower CI | upper CI | min    | max    |
|-----------------------------------|----------|-------|----------|-------|----------|----------|--------|--------|
| (Intercept)                       | 4.018    | 0.358 | (1)      | (1)   | -0.366   | 0.913    | 3.824  | 4.241  |
| condition (dummy) <sup>(2)</sup>  | 0.273    | 0.321 | (1)      | (1)   | -0.978   | 0.325    | -0.137 | -0.395 |
| condition (object) <sup>(2)</sup> | -0.328   | 0.327 | (1)      | (1)   | -0.952   | 0.349    | -0.481 | -0.162 |
| condition (social) <sup>(2)</sup> | -0.303   | 0.326 | (1)      | (1)   | -0.342   | 0.079    | -0.420 | -0.097 |
| test                              | -0.131   | 0.106 | 1.51     | 0.218 | -0.366   | 0.913    | -0.177 | -0.093 |

(1) not indicated because of having a very limited interpretation

(2) condition 'alone' is the reference category

Table 2. Results of the model-P2: differences in persistence across conditions in free-ranging dogs.

| term                              | Estimate | SE    | $\chi^2$ | p     | lower CI | upper CI | min    | max    |
|-----------------------------------|----------|-------|----------|-------|----------|----------|--------|--------|
| (Intercept)                       | 4.401    | 0.711 | (1)      | (1)   | 2.941    | 5.866    | 4.069  | 4.889  |
| condition (social) <sup>(2)</sup> | 0.302    | 0.459 | 0.430    | 0.512 | -0.639   | 1.255    | 0.073  | 0.523  |
| test                              | -0.871   | 0.461 | 3.284    | 0.069 | -1.824   | 0.077    | -1.077 | -0.644 |

(1) not indicated because of having a very limited interpretation

(2) condition 'alone' is the reference category

Table 3. Results of the model-P3: differences in persistence between pet dogs and free-ranging dogs in the social condition .

| term                            | Estimate | SE    | t     | p     | lower CI | upper CI | min    | max   |
|---------------------------------|----------|-------|-------|-------|----------|----------|--------|-------|
| (Intercept)                     | 3.233    | 0.339 | (1)   | (1)   | 2.538    | 3.927    | 2.945  | 3.406 |
| group (pet dogs) <sup>(2)</sup> | 0.151    | 0.441 | 0.342 | 0.735 | -0.750   | 1.052    | -0.023 | 0.439 |

(1) not indicated because of having a very limited interpretation

(2) group 'free-ranging dogs' is the reference category

Table 4. Results of the model-L1: differences in latency to look back across conditions in pet dogs.

| term                              | Estimate | SE    | z     | p     | lower CI | upper CI |
|-----------------------------------|----------|-------|-------|-------|----------|----------|
| condition (dummy) <sup>(1)</sup>  | -0.737   | 0.890 | -0.83 | 0.410 | -26.796  | 1.398    |
| condition (social) <sup>(1)</sup> | -1.928   | 1.161 | -1.66 | 0.097 | -22.969  | -0.989   |

(1) condition 'object' is the reference category

Table 5. Results of the model-L2: differences in latency to look back across conditions in free-ranging dogs.

| term                              | Estimate | SE    | t     | p     | lower CI | upper CI | min    | max   |
|-----------------------------------|----------|-------|-------|-------|----------|----------|--------|-------|
| (Intercept)                       | 5.729    | 1.088 | (1)   | (1)   | 3.422    | 8.036    | 4.975  | 6.349 |
| condition (social) <sup>(2)</sup> | 0.133    | 1.459 | 0.091 | 0.929 | -2.962   | 3.227    | -0.487 | 0.887 |

(1) not indicated because of having a very limited interpretation

(2) condition 'dummy' is the reference category

Table 6. Results of the model-L3: differences in latency to look back between pet dogs and free-ranging dogs in the social condition.

| term                            | Estimate | SE    | t      | p    | lower CI | upper CI | min    | max   |
|---------------------------------|----------|-------|--------|------|----------|----------|--------|-------|
| (Intercept)                     | 3.272    | 0.351 | (1)    | (1)  | 2.550    | 3.994    | 3.051  | 3.461 |
| group (pet dogs) <sup>(2)</sup> | -0.141   | 0.438 | -0.322 | 0.75 | -1.041   | 0.759    | -0.329 | 0.080 |

(1) not indicated because of having a very limited interpretation

(2) group 'free-ranging dogs' is the reference category

Table 7. Results of the model-F1: differences in frequency of looking back across conditions in pet dogs.

| term                              | Estimate | SE    | z                    | p                    | lower CI | upper CI | min    | max    |
|-----------------------------------|----------|-------|----------------------|----------------------|----------|----------|--------|--------|
| (Intercept)                       | -3.146   | 0.466 | (1)                  | (1)                  | -4.205   | -2.335   | -4.014 | -2.959 |
| condition(dummy) <sup>(2)</sup>   | 0.658    | 0.548 | 1.201 <sup>(3)</sup> | 0.229 <sup>(3)</sup> | -0.363   | 1.835    | 0.405  | 1.565  |
| condition (social) <sup>(2)</sup> | 1.643    | 0.506 | 3.250 <sup>(3)</sup> | 0.001 <sup>(3)</sup> | 0.727    | 2.755    | 1.477  | 2.588  |

(1) not indicated because of having a very limited interpretation

(2) condition 'object' is the reference category

Table 8. Results of the model-F2: differences in frequency of looking back across conditions in free-ranging dogs.

| term                              | Estimate | SE    | z     | p     | lower CI | upper CI | min    | max    |
|-----------------------------------|----------|-------|-------|-------|----------|----------|--------|--------|
| (Intercept)                       | -1.408   | 0.336 | (1)   | (1)   | -2.119   | -0.787   | -1.663 | -1.293 |
| condition (social) <sup>(2)</sup> | 0.146    | 0.446 | 0.329 | 0.742 | -0.722   | 1.039    | -0.018 | 0.401  |

(1) not indicated because of having a very limited interpretation

(2) condition 'dummy' is the reference category

Table 9. Results of the model-F3: differences in frequency of looking back at the human between pet dogs and free-ranging dogs.

| term                            | Estimate | SE    | z      | p    | lower CI | upper CI | min    | max    |
|---------------------------------|----------|-------|--------|------|----------|----------|--------|--------|
| (Intercept)                     | -1.262   | 0.292 | (1)    | (1)  | -1.871   | -0.715   | -1.427 | -1.156 |
| group (pet dogs) <sup>(2)</sup> | -0.209   | 0.359 | -0.583 | 0.56 | -0.904   | 0.514    | -0.353 | -0.045 |

(1) not indicated because of having a very limited interpretation

(2) group 'free-ranging dogs' is the reference category

Table 10. Results of the model-F4: differences between pet dogs and free-ranging dogs in frequency of looking back at the human after attempting the possible or the impossible bowls.

| term                            | Estimate | SE    | z      | p     | lower CI | upper CI | min    | max    |
|---------------------------------|----------|-------|--------|-------|----------|----------|--------|--------|
| (Intercept)                     | 0.449    | 0.356 | (1)    | (1)   | -0.215   | 1.218    | 0.294  | 0.608  |
| group (pet dogs) <sup>(2)</sup> | 0.187    | 0.449 | 0.416  | 0.678 | -0.765   | 1.105    | -0.013 | 0.482  |
| poss-imp                        | -0.379   | 0.494 | -0.767 | 0.443 | -1.411   | 0.668    | -0.546 | -0.085 |

(1) not indicated because of having a very limited interpretation

(2) group 'free-ranging dogs' is the reference category

Table 11. Results of the model-DL1: differences in duration of looking back across conditions in pet dogs.

| term                              | Estimate | SE    | z      | p      | lower CI | upper CI | min    | max    |
|-----------------------------------|----------|-------|--------|--------|----------|----------|--------|--------|
| (Intercept)                       | -3.116   | 0.215 | (1)    | (1)    | -3.536   | -2.695   | -3.296 | -3.049 |
| condition (object) <sup>(2)</sup> | -0.615   | 0.257 | -2.395 | 0.017  | -1.118   | -0.112   | -0.697 | -0.534 |
| condition (social) <sup>(2)</sup> | 0.800    | 0.235 | 3.404  | <0.001 | 0.339    | 1.261    | 0.712  | 1.022  |

(1) not indicated because of having a very limited interpretation

(2) condition 'dummy' is the reference category

Table 12. Results of the model-DL2: differences in duration of looking back across conditions in free-ranging dogs.

| term                              | Estimate | SE    | z      | p     | lower CI | upper CI | min    | max    |
|-----------------------------------|----------|-------|--------|-------|----------|----------|--------|--------|
| (Intercept)                       | -2.196   | 0.304 | (1)    | (1)   | -2.614   | -1.779   | -2.447 | -2.142 |
| condition (social) <sup>(2)</sup> | -0.346   | 0.430 | -0.805 | 0.421 | -0.936   | 0.244    | -0.499 | -0.268 |

(1) not indicated because of having a very limited interpretation

(2) condition 'dummy' is the reference category

Table 13. Results of the model-DL3: differences between pet dogs and free-ranging dogs in duration of looking back at the experimenter.

| term                            | Estimate | SE    | z     | p    | lower CI | upper CI | min    | max    |
|---------------------------------|----------|-------|-------|------|----------|----------|--------|--------|
| (Intercept)                     | -1.885   | 0.279 | (1)   | (1)  | -2.432   | -1.339   | -2.176 | -1.821 |
| group (pet dogs) <sup>(2)</sup> | 0.744    | 0.396 | 1.876 | 0.06 | 0.104    | 1.384    | 0.681  | 0.962  |

<sup>(1)</sup> not indicated because of having a very limited interpretation

<sup>(2)</sup> group 'free-ranging dogs' is the reference category

Table 14. Results of the model-W1: differences in duration of tail wagging across conditions in pet dogs.

| Term                              | Estimate | SE    | z      | p      | lower CI | upper CI | min    | max    |
|-----------------------------------|----------|-------|--------|--------|----------|----------|--------|--------|
| (Intercept)                       | -3.576   | 0.343 | (1)    | (1)    | -4.249   | -2.903   | -3.852 | -3.127 |
| condition (object) <sup>(2)</sup> | -0.723   | 0.308 | -2.349 | 0.018  | -1.326   | -0.119   | -0.890 | -0.277 |
| condition (social) <sup>(2)</sup> | 1.050    | 0.285 | 3.678  | <0.001 | 0.490    | 1.609    | -0.511 | 1.328  |

<sup>(1)</sup> not indicated because of having a very limited interpretation

<sup>(2)</sup> condition 'dummy' is the reference category

Table 15. Results of the model-W2: differences in duration of tail wagging across conditions in free-ranging dogs.

| Term                              | Estimate | SE    | z      | p    | lower CI | upper CI | min    | max    |
|-----------------------------------|----------|-------|--------|------|----------|----------|--------|--------|
| (Intercept)                       | -2.923   | 0.441 | (1)    | (1)  | -3.399   | -2.448   | -3.279 | -2.893 |
| condition (social) <sup>(2)</sup> | -0.019   | 0.561 | -0.033 | 0.97 | -0.624   | 0.586    | -0.215 | 0.082  |

<sup>(1)</sup> not indicated because of having a very limited interpretation

<sup>(2)</sup> condition 'dummy' is the reference category

Table 16. Results of the model-W3: differences between pet dogs and free-ranging dogs in duration of tail wagging at the experimenter.

| Term                            | Estimate | SE    | z     | p     | lower CI | upper CI | min    | max    |
|---------------------------------|----------|-------|-------|-------|----------|----------|--------|--------|
| (Intercept)                     | -2.577   | 0.417 | (1)   | (1)   | -3.159   | -1.995   | -2.867 | -2.546 |
| group (pet dogs) <sup>(2)</sup> | 0.449    | 0.459 | 0.977 | 0.328 | -0.193   | 1.092    | 0.393  | 0.617  |

<sup>(1)</sup> not indicated because of having a very limited interpretation

<sup>(2)</sup> group 'free-ranging dogs' is the reference category
